# Supplementary material for: Study of the modification mechanism of heavy metal ions adsorbed by biomass-activated carbon doped with a solid nitrogen source
Source: Royal Society of Chemistry journal article supplement (doi:10.1039/c9ra07191a), 2019-01-01
Supplement: c9ra07191a1.pdf [file c9ra07191a1.pdf]

Supporting Information for

**Study of The Modification Mechanism of Heavy Metal Ions Adsorbed  
by Biomass Activated Carbon Doped with Solid Nitrogen Source**

Wanlan Zheng, Shuang Chen, \* Huie Liu, Yudi Ma, and Wenlong Xu

State Key Laboratory of Heavy Oil Processing, College of Chemical  
Engineering, China University of Petroleum (East China), Qingdao,  
Shandong 266580, China.

\*E-mail: [chsh1030@163.com](mailto:chsh1030@163.com) (Shuang Chen)

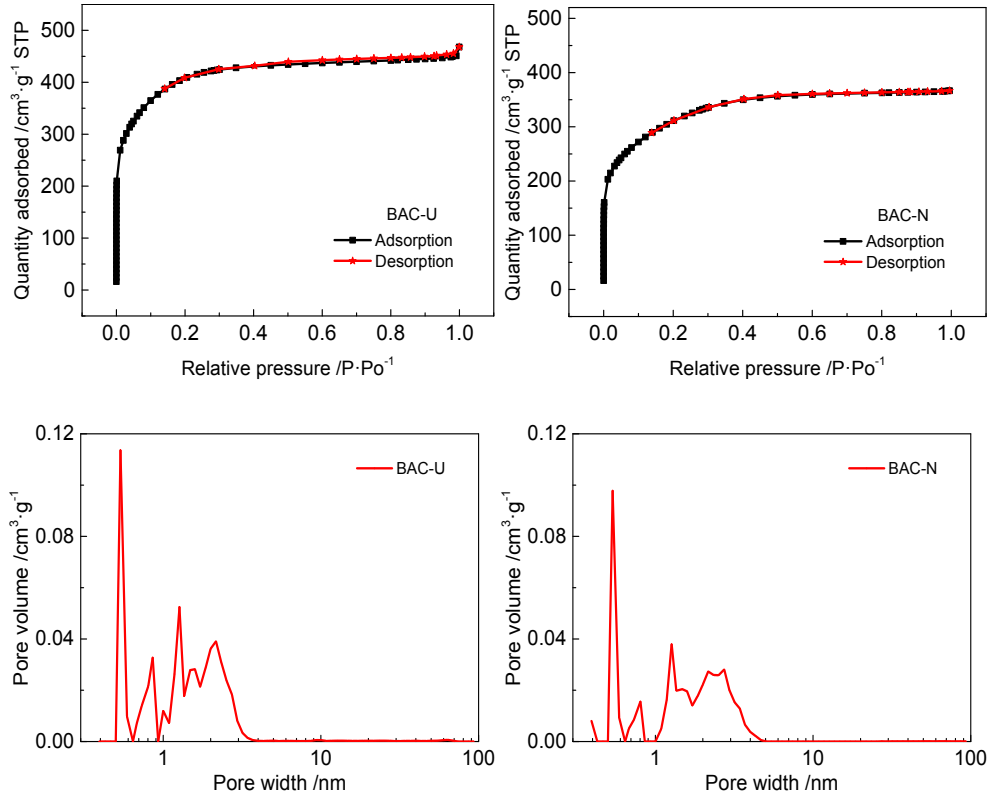

Fig.S1 N<sub>2</sub> adsorption-desorption isotherm and pore distribution of BAC-U and BAC-N

As shown in Figure S1, the isotherms of BAC-U and BAC-N can be classified as type IV, presenting a rapid adsorption of N<sub>2</sub> at low relative pressures and an adsorption platform at high relative pressures. Compared with BAC-U, the mesoporous porosity of BAC-N increased significantly in pore distribution curve.

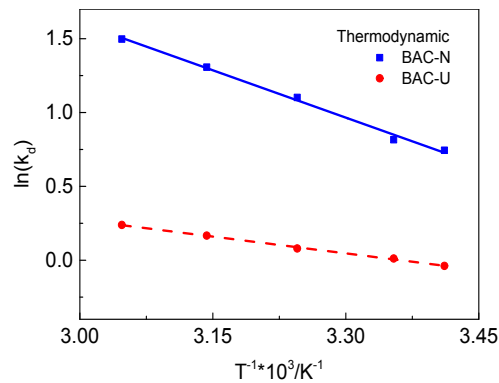

Fig.S2 Thermodynamic curve of BAC-U and BAC-N

Figure S2 shows the thermodynamic curves of two nitrogen-doped

activated carbons. The slope of two curves is less than zero, which indicates that the adsorption process is endothermic reaction. The adsorption performance of BAC-N is more obviously affected by temperature, because the absolute value of slope is larger.
